# Supplementary material for: The BRAF kinase domain promotes the development of gliomas in vivo
Source: PubMed Central journal article supplement (PMC4362480; doi:10.18632/genesandcancer.48), 2015-01
Supplement: ganc-06-009-s001.pdf [file ganc-06-009-s001.pdf]

## The BRAF kinase domain promotes the development of gliomas *in vivo*

### Supplementary Material

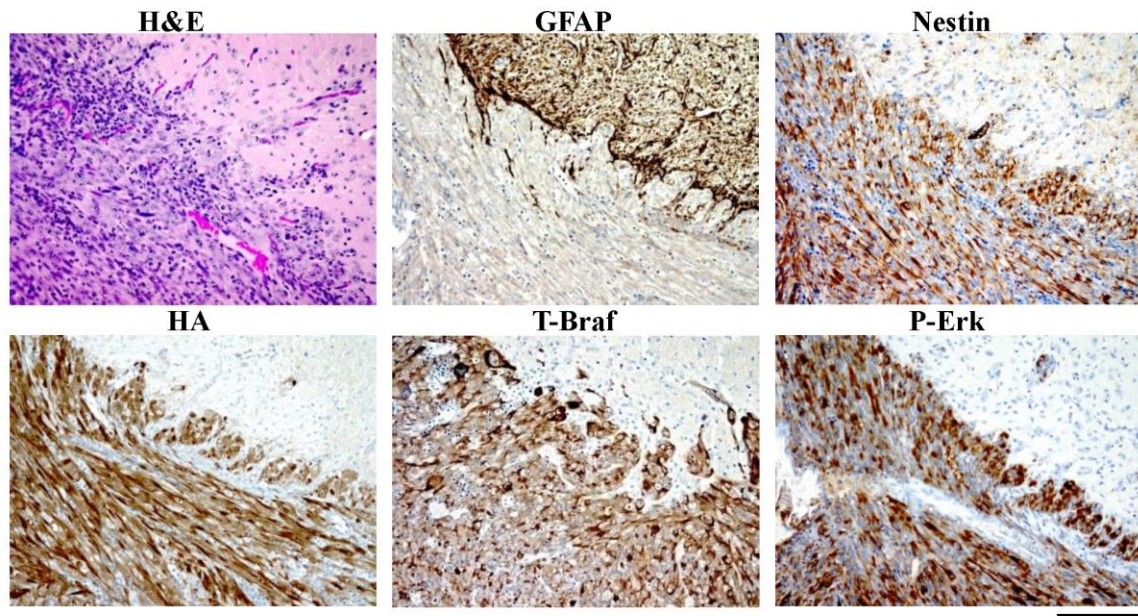

**Supplementary Figure S1: Histological examination of brain sections from mice injected with *Ink4a/Arf*-deficient astrocytes expressing BRAF-KD.** H&E: sections stained with hematoxylin and eosin. IHC for P-Erk demonstrates that the MAPK pathway is active in the tumor but not adjacent normal brain. Nestin and GFAP are glial specific markers. BRAF-KD expression was detected by IHC for the HA epitope tag on virally delivered BRAF or by using the C-terminal BRAF antibody. IHC sections were counterstained with hematoxylin. Scale bar represents 200 $\mu$ m.

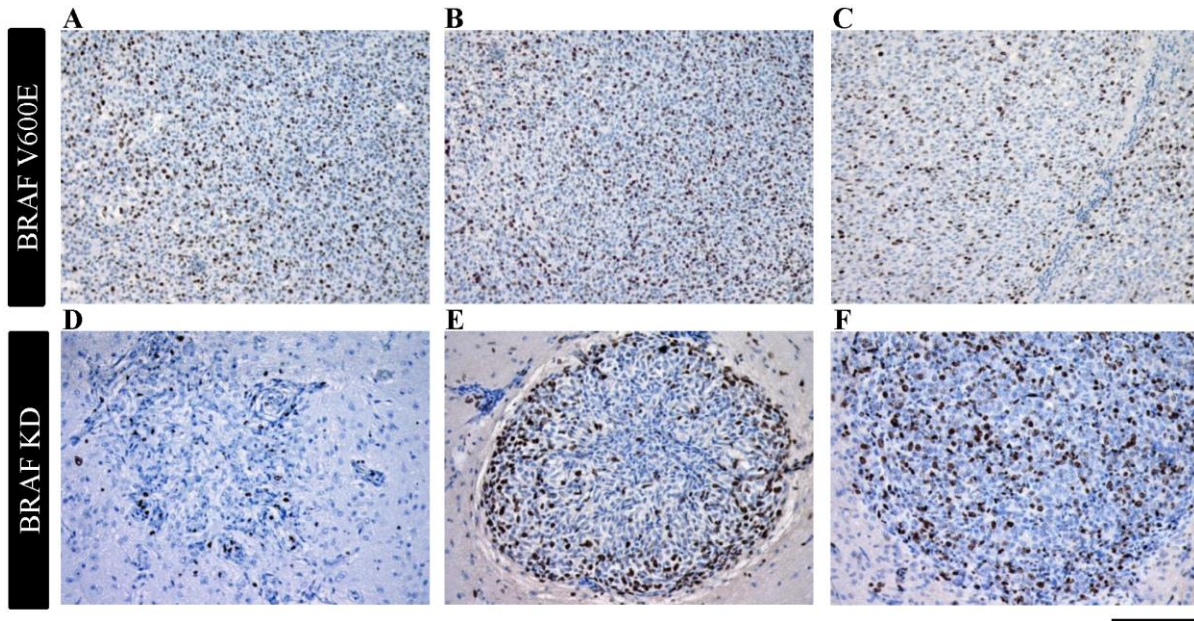

**Supplementary Figure S2: A comparison of cellular proliferation between brain sections from RCASBP(A) BRAF-KD & CRE injected and RCASBP(A) BRAFV600E & CRE injected mice. IHC for cellular proliferation marker Ki67 demonstrated that BRAFV600E tumors (A-C) were consistently highly proliferative while proliferation varied significantly in BRAF-KD tumors (D-F). IHC sections were counterstained with hematoxylin. Scale bar represents 200 $\mu$ m.**
